# Supplementary material for: Human and rat skeletal muscle single-nuclei multi-omic integrative analyses nominate causal cell types, regulatory elements, and SNPs for complex traits
Source: HighWire-hosted journal article supplement (doi:10.1101/gr.268482.120), 2021-11-23
Supplement: Supplemental_Code.zip [file ARL15-rs702634_Luciferase_Rani_12-21-20.xlsx]

## Sheet: Sheet1
ARL15-rs702634 Luciferase Assay Results
	MSC			MSC_Day2 Adipo. Diff.			MSC_Day12 Adipo. Diff.
	Exp-1	Exp-2		Exp-1	Exp-2		Exp-1
Date	2020-11-12	2020-11-20		2020-12-16	2020-12-18		2020-12-16
Ref (G) Forward
1 M-E5F1-6	27.5209	32.1449		46.2939	26.2618		27.2577
3 M-E5F1-7	36.2092	25.692		38.0093	69.3761		32.2437
4 M-E5F1-4	46.1784	45.4485		40.3244	28.0305		26.0945
5 M-E5F1-5	53.9509	32.3785		37.6506	56.7164		24.2251
Mean	40.9648	33.916		40.5695	45.0962		27.4553
Ref 2 (A) FWD
6 E5F1	12.2478	16.4532		13.0386	18.1481		17.3815
7 E5F2	13.33	8.24806		16.2369	19.8615		17.8668
8 G10F1	16.1186	10.8375		20.1334	22.4312		16.6725
9 G10F2	14.0528	19.3139		17.5897	19.8541		12.0571
10 H12F1	10.2675	20.4408		14.7869	14.6572		18.1883
Mean	13.2034	15.0587		16.3571	18.9904		16.4332
Alt (C) Reverse
11 M-E5R2-1	2.72718	2.29525		1.79976	2.55926		2.01585
12 M-E5R2-2	2.56278	2.4972		2.2202	2.54273		2.18517
13 M-E5R2-6	1.94757	3.0596		1.83902	2.22468		2.98218
14 M-E5R2-4	2.88825	3.18799		2.35551	3.09511		1.49556
15 M-E5R2-5	2.11173	2.78386		1.99839	2.43544		1.98419
Mean	2.4475	2.76478		2.04258	2.57144		2.13259
Alt (T) Reverse
16 E5R1	1.92541	1.58226		2.30037	2.27927		2.35473
17 E5R2	1.36626	2.27617		2.19732	2.04572		2.06657
18 G10R1	2.01015	1.60977		1.78701	1.4863		1.69046
19 G10R2	1.9806	2.4792		2.58256	2.06013		1.35748
20 H12R1	1.82455	1.75491		2.37	2.59381		3.02815
Mean	1.82139	1.94046		2.24745	2.09305		2.09948
Controls
PgL 4.23 (1)	0.92278	1.01791		1.22187	0.844172		1.13008
PgL 4.23 (1)	0.963364	0.81419		0.940164	1.08025		0.9079
PgL 4.23 (2)	0.972921	1.38187		0.843428	0.943493		1.07616
PgL 4.23 (2)	1.14094	0.985917		0.994541	1.13209		0.885862
Mean	1	1.04997		1	1		1
